# Supplementary material for: Proteomics-Based Systems Biology Modeling of Bovine Germinal Vesicle Stage Oocyte and Cumulus Cell Interaction
Source: PubMed Central journal article supplement (PMC2888582; doi:10.1371/journal.pone.0011240), 2010-06-21

Figure S1.

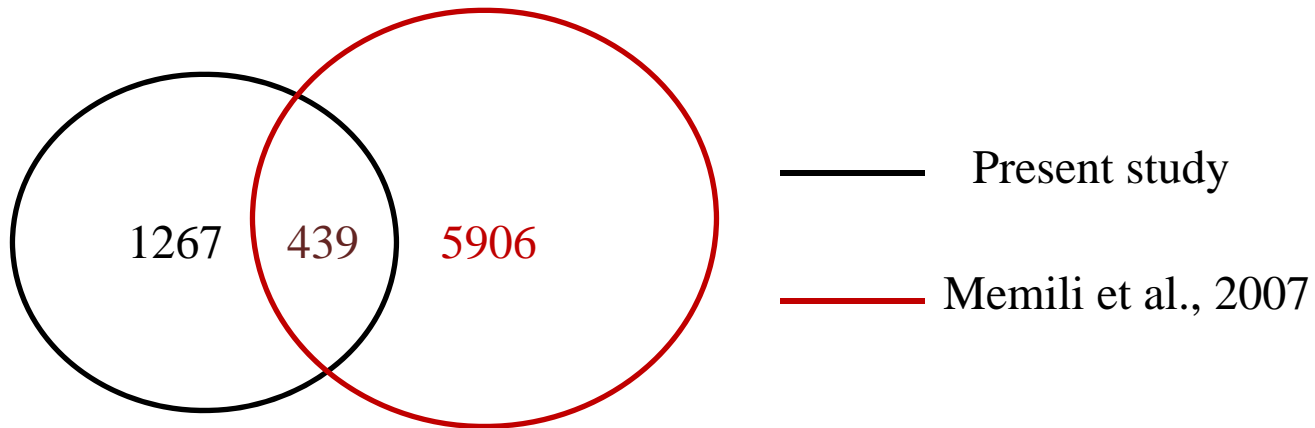

Supplement: pone.0011240.s001.pdf [file pone.0011240.s001.pdf]
